# Supplementary material for: Inter-Molecular Electrostatic Interactions Stabilizing the Structure of the PD-1/PD-L1 Axis: A Structural Evolutionary Perspective
Source: Preprints.org preprint supplement (doi:10.20944/preprints202001.0130.v1), 2020-01-12
Supplement: Supplementary file 1 [file supplementary]

| PDB  | Acceptor (A)   | Donor (D)     | Hydrogen (H)  | D-A (Å) | H-A (Å) | $\angle ADH(^{\circ})$ |
|------|----------------|---------------|---------------|---------|---------|------------------------|
| 5O45 | OD2, A_ASP_122 | N, A_VAL_21   | H, A_VAL_21   | 2.94    | 2.10    | 10.32                  |
| 5O45 | O, A_ASP_122   | N, A_ILE_116  | H, A_ILE_116  | 2.98    | 2.13    | 6.64                   |
| 5O45 | OD1, A_ASP_122 | N, A_TYR_123  | H, A_TYR_123  | 2.93    | 2.22    | 29.46                  |
| 5O4Y | O, B_ASP_122   | N, B_ILE_116  | H, B_ILE_116  | 3.00    | 2.16    | 11.79                  |
| 5O4Y | OD1, C_ASP_122 | N, C_TYR_123  | H, C_TYR_123  | 2.73    | 2.01    | 27.76                  |
| 5O4Y | O, E_ASP_122   | N, E_ILE_116  | H, E_ILE_116  | 2.99    | 2.19    | 18.05                  |
| 5O4Y | O, E_ILE_116   | N, E_ASP_122  | H, E_ASP_122  | 2.97    | 2.20    | 22.39                  |
| 5O4Y | OD1, E_ASP_122 | N, E_TYR_123  | H, E_TYR_123  | 2.81    | 2.07    | 25.74                  |
| 5XXY | OD2, A_ASP_122 | OG1, A_THR_20 | HG1, A_THR_20 | 2.93    | 2.22    | 28.25                  |
| 5XXY | OD2, A_ASP_122 | N, A_VAL_21   | H, A_VAL_21   | 2.79    | 1.95    | 10.31                  |
| 5XXY | OD1, A_ASP_122 | N, A_TYR_123  | H, A_TYR_123  | 2.80    | 2.08    | 28.06                  |

Table 1: The Asp22-linked hydrogen bonding (including both side chain and main chain) network formed within the experimentally determined PD-1/PD-L1 structures. In this table, the residue naming scheme is **Chain ID\_residue name\_residue number**,  $\angle ADH$  represents the angle formed by acceptor (A), donor (D) and hydrogen (H) ( $\angle ADH$ ).

| PDB  | Acceptor (A)   | Donor (D)     | Hydrogen (H)  | D-A (Å) | H-A (Å) | $\angle ADH(^{\circ})$ |
|------|----------------|---------------|---------------|---------|---------|------------------------|
| 5XXY | OD2, A_ASP_122 | OG1, A_THR_20 | HG1, A_THR_20 | 2.93    | 2.22    | 28.25                  |

Table 2: The Asp22-linked hydrogen bonding (including only side chain) network formed within the experimentally determined PD-1/PD-L1 structures. In this table, the residue naming scheme is **Chain ID\_residue name\_residue number**,  $\angle ADH$  represents the angle formed by acceptor (A), donor (D) and hydrogen (H) ( $\angle ADH$ ).

| PDB ID | Residue A | Atom A | Residue B | Atom B | Distance (Å) |
|--------|-----------|--------|-----------|--------|--------------|
| 3BIK   | A.LYS.124 | NZ     | A.ASP.122 | OD1    | 3.019        |
| 3BIK   | A.LYS.124 | NZ     | A.ASP.122 | OD2    | 3.912        |
| 3BIS   | A.LYS.124 | NZ     | A.ASP.122 | OD1    | 3.773        |
| 3BIS   | B.LYS.124 | NZ     | B.ASP.122 | OD1    | 3.846        |
| 3FN3   | B.LYS.124 | NZ     | B.ASP.122 | OD1    | 3.034        |
| 3SBW   | C.LYS.124 | NZ     | C.ASP.122 | OD2    | 3.377        |
| 4Z18   | B.LYS.124 | NZ     | B.ASP.122 | OD1    | 3.214        |
| 4ZQK   | A.LYS.124 | NZ     | A.ASP.122 | OD2    | 3.631        |
| 5C3T   | A.LYS.124 | NZ     | A.ASP.122 | OD1    | 3.985        |
| 5C3T   | A.LYS.124 | NZ     | A.ASP.122 | OD2    | 3.140        |
| 5GGR   | L.LYS.126 | NZ     | L.ASP.122 | OD1    | 3.367        |
| 5GGT   | A.LYS.124 | NZ     | A.ASP.122 | OD2    | 3.321        |
| 5GRJ   | A.LYS.124 | NZ     | A.ASP.122 | OD1    | 3.729        |
| 5GRJ   | A.LYS.124 | NZ     | A.ASP.122 | OD2    | 3.641        |
| 5IUS   | A.HIS.68  | NE2    | C.ASP.122 | OD1    | 2.880        |
| 5IUS   | B.HIS.68  | NE2    | D.ASP.122 | OD1    | 2.672        |
| 5IUS   | B.HIS.68  | NE2    | D.ASP.122 | OD2    | 3.787        |
| 5IUS   | C.LYS.124 | NZ     | C.ASP.122 | OD2    | 2.898        |
| 5IUS   | D.LYS.124 | NZ     | D.ASP.122 | OD2    | 3.022        |
| 5J89   | C.LYS.124 | NZ     | C.ASP.122 | OD2    | 3.308        |
| 5J89   | A.LYS.124 | NZ     | A.ASP.122 | OD2    | 3.320        |
| 5J89   | D.LYS.124 | NZ     | D.ASP.122 | OD2    | 3.158        |
| 5J8O   | A.LYS.124 | NZ     | A.ASP.122 | OD2    | 3.299        |
| 5J8O   | B.LYS.124 | NZ     | B.ASP.122 | OD2    | 2.851        |
| 5JDR   | A.LYS.124 | NZ     | A.ASP.122 | OD1    | 3.201        |
| 5JDR   | A.LYS.124 | NZ     | A.ASP.122 | OD2    | 3.566        |
| 5JDS   | A.LYS.124 | NZ     | A.ASP.122 | OD1    | 3.048        |
| 5N2D   | A.LYS.124 | NZ     | A.ASP.122 | OD1    | 3.814        |
| 5N2D   | B.LYS.124 | NZ     | B.ASP.122 | OD2    | 3.206        |
| 5N2D   | C.LYS.124 | NZ     | C.ASP.122 | OD2    | 3.423        |
| 5N2D   | D.LYS.124 | NZ     | D.ASP.122 | OD2    | 2.935        |
| 5N2F   | A.LYS.124 | NZ     | A.ASP.122 | OD2    | 3.363        |
| 5N2F   | B.LYS.124 | NZ     | B.ASP.122 | OD2    | 3.084        |
| 5NIU   | A.LYS.124 | NZ     | A.ASP.122 | OD2    | 3.492        |
| 5NIU   | B.LYS.124 | NZ     | B.ASP.122 | OD2    | 3.475        |
| 5NIU   | C.LYS.124 | NZ     | C.ASP.122 | OD2    | 3.481        |
| 5NIU   | D.LYS.124 | NZ     | D.ASP.122 | OD2    | 3.508        |
| 5NIX   | A.LYS.124 | NZ     | A.ASP.122 | OD1    | 3.930        |
| 5NIX   | A.LYS.124 | NZ     | A.ASP.122 | OD2    | 3.158        |
| 5NIX   | B.LYS.124 | NZ     | B.ASP.122 | OD1    | 3.633        |
| 5NIX   | B.LYS.124 | NZ     | B.ASP.122 | OD2    | 3.267        |
| 5NIX   | C.LYS.124 | NZ     | C.ASP.122 | OD1    | 3.855        |

|      |           |    |           |     |       |
|------|-----------|----|-----------|-----|-------|
| 5NIX | C.LYS.124 | NZ | C.ASP.122 | OD2 | 3.349 |
| 5NIX | D.LYS.124 | NZ | D.ASP.122 | OD2 | 3.416 |
| 5O45 | A.LYS.124 | NZ | A.ASP.122 | OD2 | 3.319 |
| 5O4Y | B.LYS.124 | NZ | B.ASP.122 | OD2 | 3.125 |
| 5O4Y | C.LYS.124 | NZ | C.ASP.122 | OD1 | 3.781 |
| 5O4Y | C.LYS.124 | NZ | C.ASP.122 | OD2 | 2.940 |
| 5O4Y | E.LYS.124 | NZ | E.ASP.122 | OD2 | 3.678 |
| 5WT9 | H.LYS.214 | NZ | L.ASP.122 | OD1 | 3.763 |
| 5WT9 | H.LYS.214 | NZ | L.ASP.122 | OD2 | 3.182 |
| 5X8L | A.LYS.124 | NZ | A.ASP.122 | OD2 | 3.334 |
| 5X8L | B.LYS.124 | NZ | B.ASP.122 | OD1 | 3.752 |
| 5X8L | B.LYS.124 | NZ | B.ASP.122 | OD2 | 3.564 |
| 5X8L | C.LYS.124 | NZ | C.ASP.122 | OD2 | 3.819 |
| 5X8L | D.LYS.124 | NZ | D.ASP.122 | OD2 | 3.701 |
| 5X8L | E.LYS.124 | NZ | E.ASP.122 | OD2 | 3.645 |
| 5X8M | A.LYS.124 | NZ | A.ASP.122 | OD2 | 3.674 |
| 5XJ4 | A.LYS.124 | NZ | A.ASP.122 | OD2 | 3.456 |
| 5XXY | A.LYS.124 | NZ | A.ASP.122 | OD2 | 3.664 |

Table 3: Asp122-linked salt bridging network within the experimentally determined PD-1/PD-L1 structures. In this table, the residue naming scheme is **Chain ID\_residue name\_residue number**.
