# Supplementary material for: Inter-Molecular Electrostatic Interactions Stabilizing the Structure of the PD-1/PD-L1 Axis: A Structural Evolutionary Perspective
Source: Preprints.org preprint supplement (doi:10.20944/preprints202001.0130.v1), 2020-01-12
Supplement: Supplementary file 2 [file supplementary]

| PDB ID  | Residue A | Atom A | Residue B | Atom B | Distance (Å) |
|---------|-----------|--------|-----------|--------|--------------|
| 2M2D-17 | A_ARG_139 | NH1    | A_GLU_136 | OE1    | 2.931        |
| 2M2D-17 | A_ARG_139 | NH2    | A_GLU_136 | OE1    | 2.794        |
| 2M2D-27 | A_ARG_139 | NH1    | A_GLU_136 | OE1    | 2.983        |
| 2M2D-27 | A_ARG_139 | NH2    | A_GLU_136 | OE1    | 2.775        |
| 2M2D-31 | A_ARG_139 | NH2    | A_GLU_136 | OE1    | 2.789        |
| 2M2D-35 | A_ARG_139 | NH1    | A_GLU_136 | OE1    | 2.862        |
| 2M2D-35 | A_ARG_139 | NH2    | A_GLU_136 | OE1    | 2.782        |
| 3BIK    | A_ARG_113 | NH2    | B_GLU_136 | OE2    | 3.149        |
| 3BIK    | A_ARG_125 | NH2    | B_GLU_136 | OE1    | 3.033        |
| 3BIK    | A_ARG_125 | NH2    | B_GLU_136 | OE2    | 3.001        |
| 3SBW    | B_ARG_114 | NH2    | A_GLU_136 | OE1    | 3.450        |
| 3SBW    | C_ARG_113 | NH2    | B_GLU_136 | OE1    | 3.510        |
| 3SBW    | C_ARG_125 | NH1    | B_GLU_136 | OE1    | 3.198        |
| 3SBW    | C_ARG_125 | NH1    | B_GLU_136 | OE2    | 2.810        |
| 4ZQK    | A_ARG_113 | NH2    | B_GLU_136 | OE1    | 2.645        |
| 4ZQK    | A_ARG_113 | NH2    | B_GLU_136 | OE2    | 2.986        |
| 5GGR    | Y_ARG_139 | NH2    | Y_GLU_136 | OE1    | 3.539        |
| 5GGR    | Z_ARG_139 | NH1    | Z_GLU_136 | OE1    | 3.800        |
| 5GGR    | Z_ARG_139 | NH2    | Z_GLU_136 | OE1    | 3.965        |
| 5GGR    | Z_ARG_139 | NH2    | Z_GLU_136 | OE2    | 3.968        |
| 5GGS    | Z_ARG_139 | NH2    | Z_GLU_136 | OE1    | 3.912        |

Table 1: Glu136-linked salt bridging networks within the experimentally determined PD-1/PD-L1 structures. In this table, the residue naming scheme is **Chain ID\_residue name\_residue number**. As PDB ID 2M2D represents an NMR (Nuclear Magnetic Resonance) ensemble, 2M2D-17 represents the 17<sup>th</sup> structural model of PD-1 experimentally determined by NMR spectroscopy.
