# Supplementary material for: Inter-Molecular Electrostatic Interactions Stabilizing the Structure of the PD-1/PD-L1 Axis: A Structural Evolutionary Perspective
Source: Preprints.org preprint supplement (doi:10.20944/preprints202001.0130.v1), 2020-01-12
Supplement: Supplementary file 4 [file supplementary]

| PDB  | Acceptor (A) | Donor (D)      | Hydrogen (H)    | D-A (Å) | H-A (Å) | $\angle ADH(^{\circ})$ |
|------|--------------|----------------|-----------------|---------|---------|------------------------|
| 5O4Y | O, D_PHE_1   | NH2, E_ARG_125 | HH21, E_ARG_125 | 2.98    | 2.14    | 12.47                  |

Table 1: The hydrogen bond formed between Arg125 of PD-1 and Phe1 of its inhibitor (PDB ID: 5O4Y). In this table, the residue naming scheme is **Chain ID\_residue name\_residue number**,  $\angle ADH$  represents the angle formed by acceptor (A), donor (D) and hydrogen (H) ( $\angle ADH$ ).

| PDB ID | Residue A | Atom A | Residue B | Atom B | Distance (Å) |
|--------|-----------|--------|-----------|--------|--------------|
| 3BIK   | A_ARG_125 | NH2    | B_GLU_136 | OE1    | 3.033        |
| 3BIK   | A_ARG_125 | NH2    | B_GLU_136 | OE2    | 3.001        |
| 3SBW   | C_ARG_125 | NH1    | B_GLU_136 | OE1    | 3.198        |
| 3SBW   | C_ARG_125 | NH1    | B_GLU_136 | OE2    | 2.810        |
| 5IUS   | C_ARG_125 | NH1    | A_GLU_70  | OE1    | 3.144        |
| 5IUS   | C_ARG_125 | NH1    | A_GLU_70  | OE2    | 2.870        |
| 5IUS   | C_ARG_125 | NH2    | A_GLU_70  | OE2    | 2.861        |
| 5IUS   | D_ARG_125 | NH2    | B_GLU_70  | OE1    | 3.305        |
| 5IUS   | D_ARG_125 | NH2    | B_GLU_70  | OE2    | 3.337        |
| 5J89   | C_ARG_125 | NH1    | D_ASP_61  | OD1    | 3.128        |
| 5J89   | A_ARG_125 | NH1    | B_ASP_61  | OD2    | 3.707        |
| 5J8O   | B_ARG_125 | NH1    | A_ASP_61  | OD2    | 3.401        |
| 5N2D   | A_ARG_125 | NH1    | B_ASP_61  | OD2    | 3.726        |
| 5N2D   | B_ARG_125 | NH2    | A_GLU_58  | OE1    | 3.996        |
| 5N2D   | B_ARG_125 | NH2    | A_ASP_61  | OD2    | 3.034        |
| 5N2D   | C_ARG_125 | NH1    | D_ASP_61  | OD2    | 3.979        |
| 5N2F   | B_ARG_125 | NH2    | A_ASP_61  | OD1    | 3.490        |
| 5NIU   | A_ARG_125 | NH2    | B_ASP_61  | OD1    | 3.287        |
| 5NIU   | B_ARG_125 | NH2    | A_ASP_61  | OD1    | 3.247        |
| 5NIU   | C_ARG_125 | NH2    | D_ASP_61  | OD1    | 3.661        |
| 5NIX   | B_ARG_125 | NH1    | A_ASP_61  | OD2    | 3.957        |
| 5NIX   | C_ARG_125 | NH1    | D_ASP_61  | OD1    | 3.476        |
| 5NIX   | C_ARG_125 | NH2    | D_ASP_61  | OD1    | 1.493        |
| 5NIX   | C_ARG_125 | NH2    | D_ASP_61  | OD2    | 3.393        |
| 5X8L   | A_ARG_125 | NH1    | F_ASP_31  | OD1    | 3.967        |
| 5X8L   | A_ARG_125 | NH2    | F_ASP_31  | OD1    | 2.989        |
| 5X8L   | B_ARG_125 | NH2    | G_ASP_31  | OD1    | 2.787        |
| 5X8L   | B_ARG_125 | NH2    | G_ASP_31  | OD2    | 3.932        |
| 5X8L   | C_ARG_125 | NH2    | H_ASP_31  | OD1    | 2.813        |
| 5X8L   | C_ARG_125 | NH2    | H_ASP_31  | OD2    | 3.969        |
| 5X8L   | D_ARG_125 | NH1    | S_ASP_31  | OD1    | 3.645        |
| 5X8L   | D_ARG_125 | NH2    | S_ASP_31  | OD1    | 3.477        |
| 5X8L   | E_ARG_125 | NH2    | J_ASP_31  | OD1    | 3.207        |
| 5XXY   | A_ARG_125 | NH2    | H_ASP_31  | OD1    | 3.134        |

Table 2: Arg125-linked salt bridging networks within the experimentally determined PD-1/PD-L1 structures. In this table, the residue naming scheme is **Chain ID\_residue name\_residue number**.
