# Supplementary material for: Inter-Molecular Electrostatic Interactions Stabilizing the Structure of the PD-1/PD-L1 Axis: A Structural Evolutionary Perspective
Source: Preprints.org preprint supplement (doi:10.20944/preprints202001.0130.v1), 2020-01-12
Supplement: Supplementary file 5 [file supplementary]

# Investigation on the Inter-Molecular Electrostatic Interactions Stabilizing the Structure of the PD-1/PD-L1 Axis: An In Silico Study

Wei Li \*

December 26, 2019

---

\*Institute of Special Environment Medicine, Institute of Nautical Medicine, Department of Nautical Medicine, Nantong University, No. 9, Seyuan Road, Nantong City, Jiangsu Province, P. R. China

## Supplementary materials

| No. | PDB ID | Structure Title                                                                                         |
|-----|--------|---------------------------------------------------------------------------------------------------------|
| 1   | 1NPU   | Crystal structure of the extracellular domain of murine PD-1                                            |
| 2   | 2M2D   | Human programmed cell death 1 receptor                                                                  |
| 3   | 3BIK   | Crystal Structure of the PD-1/PD-L1 Complex                                                             |
| 4   | 3BP5   | Crystal structure of the mouse PD-1 and PD-L2 complex                                                   |
| 5   | 3BP6   | Crystal structure of the mouse PD-1 Mutant and PD-L2 complex                                            |
| 6   | 3RNK   | Crystal structure of the complex between mouse PD-1 mutant and PD-L2 IgV domain                         |
| 7   | 3RNQ   | Crystal structure of the complex between the extracellular domains of mouse PD-1 mutant and PD-L2       |
| 8   | 3RRQ   | Crystal structure of the extracellular domain of human PD-1                                             |
| 9   | 3SBW   | Crystal structure of the complex between the extracellular domains of mouse PD-1 mutant and human PD-L1 |
| 10  | 4ZQK   | Structure of the complex of human programmed death-1 (PD-1) and its ligand PD-L1.                       |
| 11  | 5B8C   | High resolution structure of the human PD-1 in complex with pembrolizumab Fv                            |
| 12  | 5GGR   | PD-1 in complex with nivolumab Fab                                                                      |
| 13  | 5GGS   | PD-1 in complex with pembrolizumab Fab                                                                  |
| 14  | 5IUS   | Crystal structure of human PD-L1 in complex with high affinity PD-1 mutant                              |
| 15  | 5JXE   | Human PD-1 ectodomain complexed with Pembrolizumab Fab                                                  |
| 16  | 5WT9   | Complex structure of PD-1 and nivolumab-Fab                                                             |
| 17  | 6HIG   | hPD-1/NBO1a Fab complex                                                                                 |
| 18  | 6J14   | Complex structure of GY-14 and PD-1                                                                     |
| 19  | 6J15   | Complex structure of GY-5 Fab and PD-1                                                                  |
| 20  | 6JBT   | Complex structure of toripalimab-Fab and PD-1                                                           |
| 21  | 6JJP   | Crystal structure of Fab of a PD-1 monoclonal antibody MW11-h317 in complex with PD-1                   |
| 22  | 6K0Y   | Study of the interactions of a novel monoclonal antibody, mAb059c, with the hPD-1 receptor              |
| 23  | 6UMT   | High-affinity human PD-1 PD-L2 complex                                                                  |
| 24  | 6UMU   | Human apo PD-1 triple mutant                                                                            |
| 25  | 6UMV   | Human apo PD-1 double mutant                                                                            |

Table 1: PD-1-related experimental structures as of December 24, 2019 in the Protein Data Bank with a **Text Search** for: pd1 and **Molecule** : Programmed cell death protein 1. In this table, each shaded gray row represents an experimentally determined structure of the PD-1/PD-L1 complex.

| No. | PDB ID | Structure Title                                                                                         |
|-----|--------|---------------------------------------------------------------------------------------------------------|
| 1   | 1NPU   | Crystal structure of the extracellular domain of murine PD-1                                            |
| 2   | 2M2D   | Human programmed cell death 1 receptor                                                                  |
| 3   | 3BIK   | Crystal Structure of the PD-1/PD-L1 Complex                                                             |
| 4   | 3BP5   | Crystal structure of the mouse PD-1 and PD-L2 complex                                                   |
| 5   | 3BP6   | Crystal structure of the mouse PD-1 Mutant and PD-L2 complex                                            |
| 6   | 3RNK   | Crystal structure of the complex between mouse PD-1 mutant and PD-L2 IgV domain                         |
| 7   | 3RNQ   | Crystal structure of the complex between the extracellular domains of mouse PD-1 mutant and PD-L2       |
| 8   | 3RRQ   | Crystal structure of the extracellular domain of human PD-1                                             |
| 9   | 3SBW   | Crystal structure of the complex between the extracellular domains of mouse PD-1 mutant and human PD-L1 |
| 10  | 4ZQK   | Structure of the complex of human programmed death-1 (PD-1) and its ligand PD-L1.                       |
| 11  | 5B8C   | High resolution structure of the human PD-1 in complex with pembrolizumab Fv                            |
| 12  | 5GGR   | PD-1 in complex with nivolumab Fab                                                                      |
| 13  | 5GGS   | PD-1 in complex with pembrolizumab Fab                                                                  |
| 14  | 5IUS   | Crystal structure of human PD-L1 in complex with high affinity PD-1 mutant                              |
| 15  | 5JXE   | Human PD-1 ectodomain complexed with Pembrolizumab Fab                                                  |
| 16  | 5WT9   | Complex structure of PD-1 and nivolumab-Fab                                                             |
| 17  | 6HIG   | hPD-1/NBO1a Fab complex                                                                                 |
| 18  | 6J14   | Complex structure of GY-14 and PD-1                                                                     |
| 19  | 6J15   | Complex structure of GY-5 Fab and PD-1                                                                  |
| 20  | 6JBT   | Complex structure of toripalimab-Fab and PD-1                                                           |
| 21  | 6JJP   | Crystal structure of Fab of a PD-1 monoclonal antibody MW11-h317 in complex with PD-1                   |
| 22  | 6K0Y   | Study of the interactions of a novel monoclonal antibody, mAb059c, with the hPD-1 receptor              |
| 23  | 6UMT   | High-affinity human PD-1 PD-L2 complex                                                                  |
| 24  | 6UMU   | Human apo PD-1 triple mutant                                                                            |
| 25  | 6UMV   | Human apo PD-1 double mutant                                                                            |

Table 2: PD-1-related experimental structures as of December 24, 2019 in the Protein Data Bank with a **Text Search** for: pd1 and **Molecule** : Programmed cell death protein 1. In this table, each shaded gray row represents an experimentally determined structure of the PD-1/PD-L2 complex.

| No. | PDB ID | Structure Title                                                                                         |
|-----|--------|---------------------------------------------------------------------------------------------------------|
| 1   | 3BIK   | Crystal Structure of the PD-1/PD-L1 Complex                                                             |
| 2   | 3BIS   | Crystal Structure of the PD-L1                                                                          |
| 3   | 3FN3   | Dimeric Structure of PD-L1                                                                              |
| 4   | 3SBW   | Crystal structure of the complex between the extracellular domains of mouse PD-1 mutant and human PD-L1 |
| 5   | 4Z18   | Crystal structure of human PD-L1                                                                        |
| 6   | 4ZQK   | Structure of the complex of human programmed death-1 (PD-1) and its ligand PD-L1.                       |
| 7   | 5C3T   | PD-1 binding domain from human PD-L1                                                                    |
| 8   | 5GGT   | PD-L1 in complex with BMS-936559 Fab                                                                    |
| 9   | 5GRJ   | Crystal structure of human PD-L1 with monoclonal antibody avelumab                                      |
| 10  | 5IUS   | Crystal structure of human PD-L1 in complex with high affinity PD-1 mutant                              |
| 11  | 5J89   | Structure of human Programmed cell death 1 ligand 1 (PD-L1) with low molecular mass inhibitor           |
| 12  | 5J8O   | Structure of human Programmed cell death 1 ligand 1 (PD-L1) with low molecular mass inhibitor           |
| 13  | 5JDR   | Structure of PD-L1                                                                                      |
| 14  | 5JDS   | Crystal structure of PD-L1 complexed with a nanobody at 1.7 Angstrom resolution                         |
| 15  | 5N2D   | Structure of PD-L1/small-molecule inhibitor complex                                                     |
| 16  | 5N2F   | Structure of PD-L1/small-molecule inhibitor complex                                                     |
| 17  | 5NIU   | Structure of human Programmed cell death 1 ligand 1 (PD-L1) with low molecular mass inhibitor           |
| 18  | 5O45   | Structure of human PD-L1 in complex with inhibitor                                                      |
| 19  | 5O4Y   | Structure of human PD-L1 in complex with inhibitor                                                      |
| 20  | 5X8L   | PD-L1 in complex with atezolizumab                                                                      |
| 21  | 5X8M   | PD-L1 in complex with durvalumab                                                                        |
| 22  | 5XJ4   | Complex structure of durvalumab-scFv/PD-L1                                                              |
| 23  | 5XXY   | Crystal structure of PD-L1 complexed with atezolizumab fab at 2.9A                                      |
| 24  | 6NM7   | PD-L1 IgV domain bound to fragment                                                                      |
| 25  | 6NM8   | IgV-V76T BMS compound 105                                                                               |
| 26  | 6NNV   | PD-L1 IgV domain complex with macro-cyclic peptide                                                      |
| 27  | 6NOJ   | PD-L1 IgV domain V76T with fragment                                                                     |
| 28  | 6NOS   | PD-L1 IgV domain V76T with fragment                                                                     |
| 29  | 6NP9   | PD-L1 IgV domain V76T with fragment                                                                     |
| 30  | 6R3K   | Structure of human Programmed cell death 1 ligand 1 (PD-L1) with low molecular mass inhibitor           |
| 31  | 6RPG   | Structure of human Programmed cell death 1 ligand 1 (PD-L1) with inhibitor                              |

Table 3: PD-L1-related experimental structures as of December 24, 2019 in the Protein Data Bank with a **Text Search** for: pdl1 and **Molecule** : Programmed cell death 1 ligand 1. In this table, each shaded gray row represents an experimentally determined structure of the PD-1/PD-L1 complex.

|         |                                                                                                                                         |
|---------|-----------------------------------------------------------------------------------------------------------------------------------------|
| PD-1    | Uniform resource locators (URLs)                                                                                                        |
| Gene    | <a href="https://www.ncbi.nlm.nih.gov/gene/5133">https://www.ncbi.nlm.nih.gov/gene/5133</a>                                             |
| Uniprot | <a href="https://www.uniprot.org/uniprot/Q15116">https://www.uniprot.org/uniprot/Q15116</a>                                             |
| Protein | <a href="https://www.ncbi.nlm.nih.gov/protein/AJS10360.1">https://www.ncbi.nlm.nih.gov/protein/AJS10360.1</a>                           |
| BioMuta | <a href="https://hive.biochemistry.gwu.edu/biomuta/proteinview/Q15116">https://hive.biochemistry.gwu.edu/biomuta/proteinview/Q15116</a> |
| PD-L1   | Uniform resource locators (URLs)                                                                                                        |
| Gene    | <a href="https://www.ncbi.nlm.nih.gov/gene/29126">https://www.ncbi.nlm.nih.gov/gene/29126</a>                                           |
| Uniprot | <a href="https://www.uniprot.org/uniprot/Q9NZQ7">https://www.uniprot.org/uniprot/Q9NZQ7</a>                                             |
| Protein | <a href="https://www.ncbi.nlm.nih.gov/protein/AAP13470.1">https://www.ncbi.nlm.nih.gov/protein/AAP13470.1</a>                           |
| BioMuta | <a href="https://hive.biochemistry.gwu.edu/biomuta/proteinview/Q9NZQ7">https://hive.biochemistry.gwu.edu/biomuta/proteinview/Q9NZQ7</a> |

Table 4: Online resources for gene sequences, protein sequences, structural and functional information of the two immune checkpoints.
