# Supplementary material for: Inter-Molecular Electrostatic Interactions Stabilizing the Structure of the PD-1/PD-L1 Axis: A Structural Evolutionary Perspective
Source: Preprints.org preprint supplement (doi:10.20944/preprints202001.0130.v1), 2020-01-12
Supplement: Supplementary file 6 [file supplementary]

# The amino acid sequence and point mutation map of PD-1

M Q I P Q **A** P W P V V W A V L Q L G **W** **R** **P** G W F L D  
S P D R P **W** **N** **P** P T F **S** P A L L **V** **V** T E G D **N** A T  
F T C S F S N T **S** E S F V L N W Y **R** **M** S P S N Q T D K  
L A A F P E D **R** S Q **P** G Q D C R F R V T Q L P N G **R** **D**  
F H M **S** **V** V R A R **R** N D S **G** T Y L C G **A** **I** **S** L A P K  
**A** Q I K **E** **S** **L** **R** A E L R V T E R R **A** **E** **V** **P** **T** **A** **H**  
**P** S P S **P** R P A G Q F Q **T** L V V G V **V** **G** **G** **L** L G S L V  
L L V W V L A **V** I C S R **A** A R G T I **G** **A** **R** **R** T G Q P L  
K **E** **D** **P** **S** **A** V P V F **S** V D Y G E L D **F** **Q** **W** **R** **E** **K**  
**T** **P** E P P **V** **P** **C** V P E Q T **E** Y A T I V F **P** S G M G T  
S S P **A** **R** **R** G S A **D** **G** **P** **R** S A Q P L R P E D G H C  
**S** W P L

# The amino acid sequence and point mutation map of PD-L1

MRIF **A** VFIFMT **Y** WHLLN **A** FTVTV **P** KDL  
YVV **E** YGSNMT **I** ECKFPVEKQLDL **A** ALI  
**V** Y **W** EM **E** DKNII **Q** F **V** **H** G **E** **E** **D** LKVQH  
SSY **R** QR **A** **R** LLKDQL **S** LGNAALQITDVK  
LQ **D** AGVYRC **M** ISYGGADYKRIT **V** KVN **A**  
PY **N** **K** **I** NQ **R** ILVVD PVTSEHELT **C** **Q** **A**  
**E** **G** YPKA **E** VI **W** TSSDHQVLSGKTTTNS  
KRE **E** KLFNVTSTL **R** IN **T** TTNEIFYC **T** FR  
RLD **P** EENHTAE **L** **V** IPELPLA **H** **P** **P** NERT  
HLVILGAILLCLGVALTFIF **R** LR **K** GRM **M**  
**D** **V** KKC GIQ **D** **T** NS **K** KQSDTHLEET
