# Supplementary material for: Inter-Molecular Electrostatic Interactions Stabilizing the Structure of the PD-1/PD-L1 Axis: A Structural Evolutionary Perspective
Source: Preprints.org preprint supplement (doi:10.20944/preprints202001.0130.v1), 2020-01-12
Supplement: Supplementary file 7 [file supplementary]

Archive with 7 entries (6 files):
- suppMaterial/
- suppMaterial/Arg125.pdf
- suppMaterial/Asp122.pdf
- suppMaterial/Glu136.pdf
- suppMaterial/ImageCopyright.pdf
- suppMaterial/PD1-PDL1mutationMaps.pdf
- suppMaterial/supp.pdf
